# Supplementary material for: A Model for the Homotypic Interaction between Na+,K+-ATPase β1 Subunits Reveals the Role of Extracellular Residues 221–229 in Its Ig-Like Domain
Source: MDPI journal article supplement (doi:10.3390/ijms20184538), 2019-09-13
Supplement: s1 [file s1]

**a**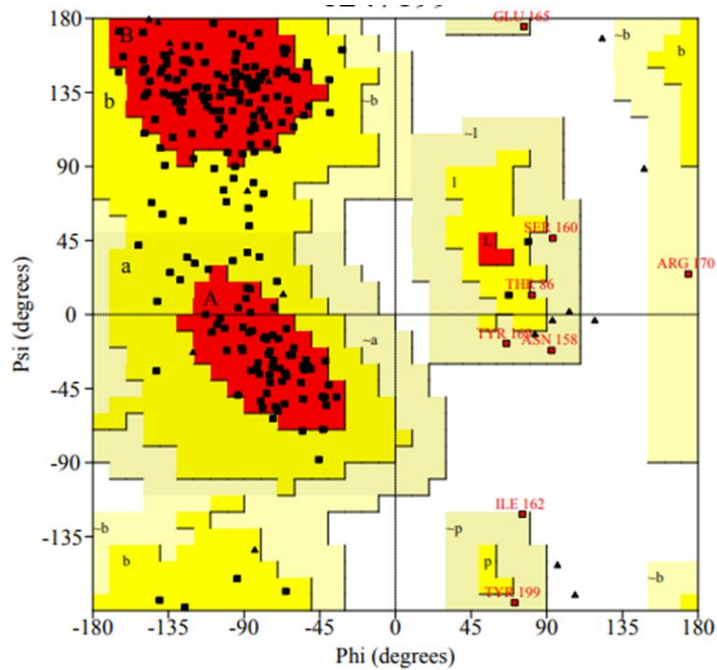

#### Plot statistics

|                                                      |     |        |
|------------------------------------------------------|-----|--------|
| Residues in most favoured regions [A,B,L]            | 157 | 77.3%  |
| Residues in additional allowed regions [a,b,l,p]     | 38  | 18.7%  |
| Residues in generously allowed regions [-a,-b,-l,-p] | 8   | 3.9%   |
| Residues in disallowed regions                       | 0   | 0.0%   |
| -----                                                |     |        |
| Number of non-glycine and non-proline residues       | 203 | 100.0% |
| Number of end-residues (excl. Gly and Pro)           | 2   |        |
| Number of glycine residues (shown as triangles)      | 19  |        |
| Number of proline residues                           | 19  |        |
| -----                                                |     |        |
| Total number of residues                             | 243 |        |

**b**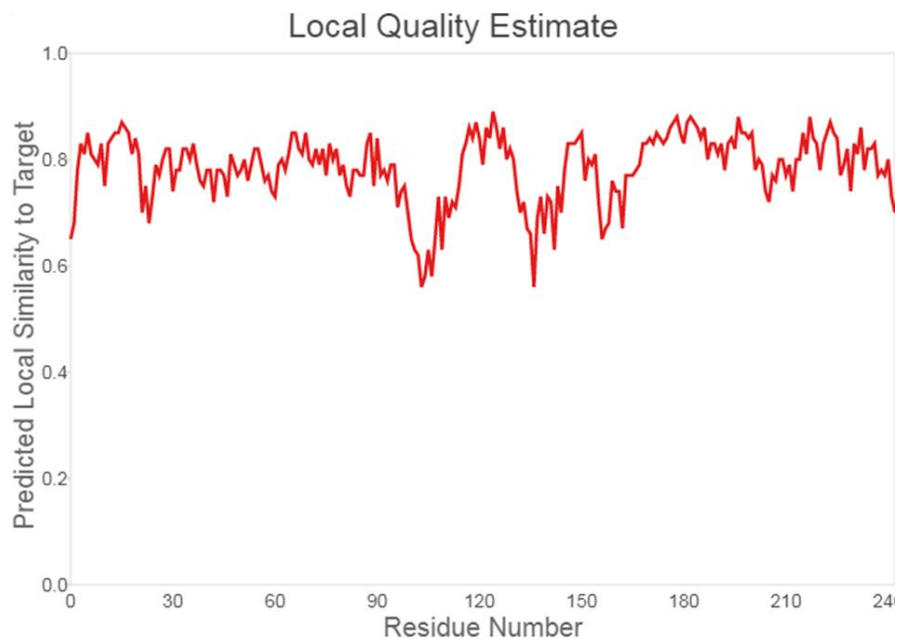

**Figure S1. Quality assessment of the dog ED  $\beta_1$  model.**

**a)** Ramachandran plot for the dog  $\beta_1$  subunit extracellular domain model ED  $\beta_1$ . In ED  $\beta_1$  77.3% of residues were present in most favourable region, 18.7% in additional allowed region and 3.9% in generously allowed region. No residues were detected in the disallowed region. Plots were generated in the server PROCHECK (<https://servicesn.mbi.ucla.edu/PROCHECK/>)<sup>49</sup>. **b)** Quality estimate per residue: QMEAN (Qualitative Model Energy ANALysis) is a composite scoring function covering the main aspects of protein stability and describing the agreement of predicted and calculated secondary structure and solvent accessibility<sup>50</sup>. As the reliability of the prediction heavily depends on model size, the provided error estimate is calculated based on models of similar size to the input. ED  $\beta_1$  had a QMEAN score of  $0.78 \pm 0.05$ . Scores of  $-4.0$  or below are an indication of models of low quality. Evaluation of models is available at the SwissModel workspace (<https://swissmodel.expasy.org/>)

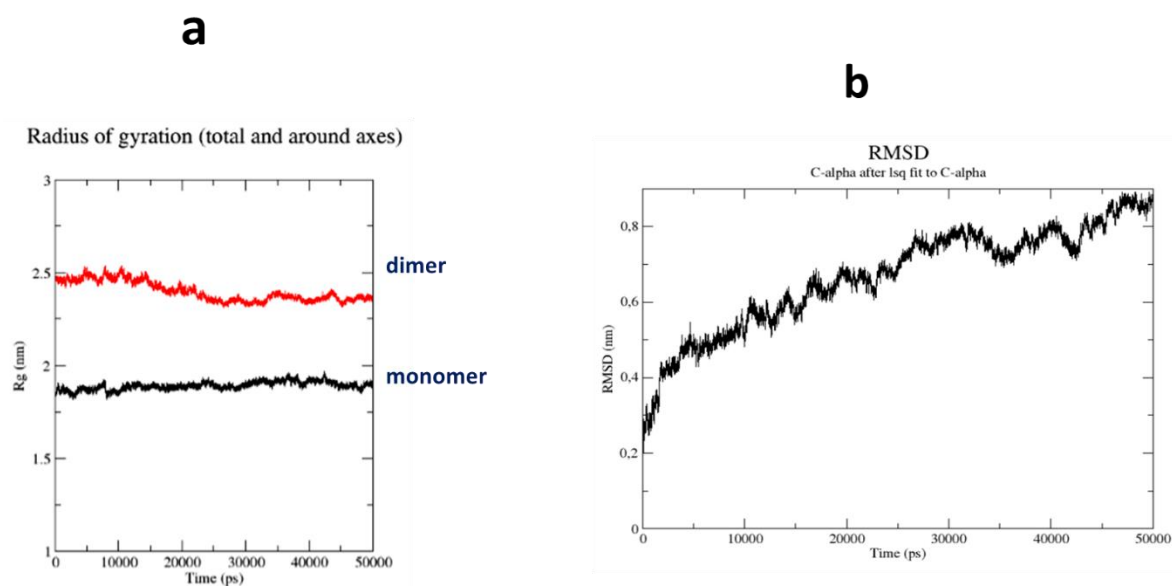

**Figure S2. Molecular Dynamics simulations of Model A.**

**a)** Radius of gyration (Rg). Rg is a simple measure of expansion and firmness of the system. The calculated 2D plot for mean Rg of the system was consistent with a stable dimer as compared to the monomer system. **b)** Backbone RMSD scores observed over a period of 50 ns shows that the complex reaches stability by 30 ns of simulation and keeps suffering structural rearrangements by the end of the simulation.

**a**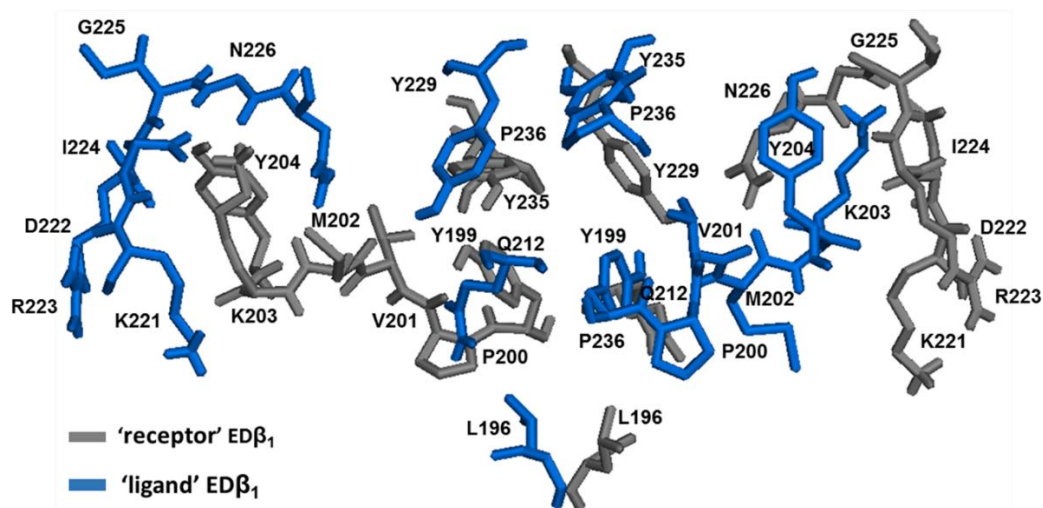**b**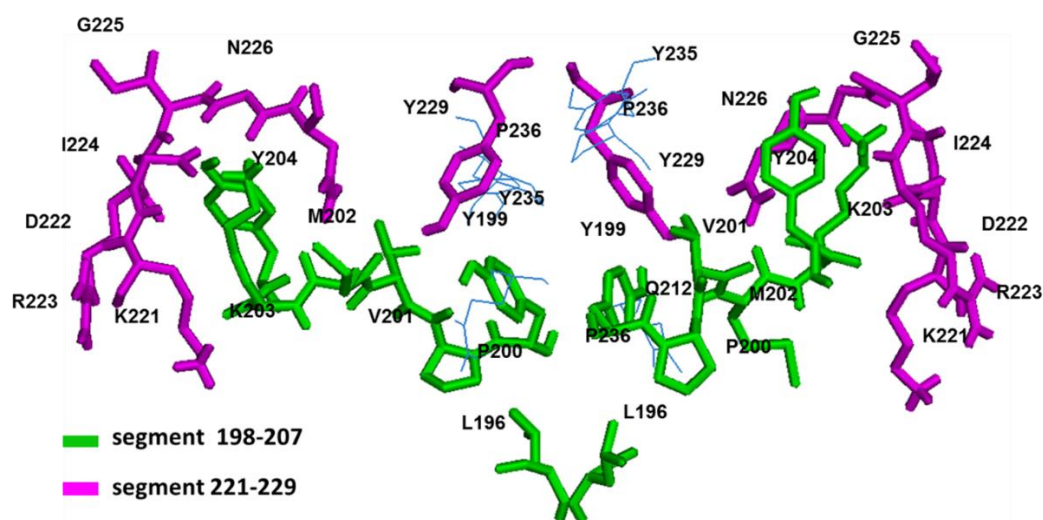**c**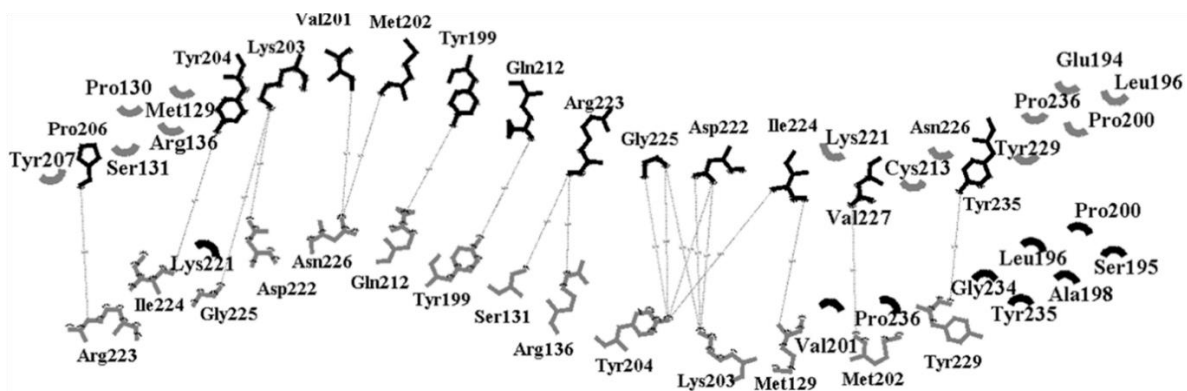

### Figure S3 Detail of the interface in 3D and 2D.

Residues forming the symmetrical interface in model A from the ED $\beta_1$  docking prediction are shown in sticks model distinguishing: **a)** each of the interacting proteins and **b)** the location of segment 221-229 mutated in this study versus 198-207, used to refine the prediction. **c)** Two dimensional model of all residues at the interface generated with the academic version of LigPlot+ program v.4.5.3 LigPlot+<sup>51</sup>. Lateral chain from residues involved in hydrophobic and polar interactions are depicted in sticks model and residues involved in hydrophobic interactions only are depicted with the symbol: . Hydrogen bonds are represented by lines.

### References

49. Laskowski, R.A.; MacArthur, M.A.; Moss, D.S.; Thornton, J.M. 2019. (1993). PROCHECK—A Program to Check the Stereochemical Quality of Protein Structures. *J. Appl. crystallogr.* **1993**, *26*, 283–291, doi:10.1107/S0021889892009944.
50. Benkert, P.; Biasini, M.; Schwede, T. Toward the Estimation of the Absolute Quality of Individual Protein Structure Models. *Bioinformatics* **2011**, *27*, 343–350, doi:10.1093/bioinformatics/btq662.
51. Laskowski, R. A.; Swindells, M B. LigPlot+: Multiple Ligand-Protein Interaction Diagrams for Drug Discovery. *J. Chem. Inf. Model.* **2011**, *51*, 2778–2786, doi:10.1021/ci200227u.
